# Supplementary material for: Accuracy of B-mode ultrasonography and ARFI elastography in the evaluation of the hip joint and hip musculature for the early and late diagnosis of hip dysplasia in dogs
Source: Research Square preprint supplement (doi:10.21203/rs.3.rs-2353704/v1), 2022-12-13
Supplement: Supplementary file 1 [file 510ed66f7995aa9ec857f6b5.xlsx]

## Sheet: Dados
Grupo 2 - Pacientes Adultos
Articulação	OFA	AchadosArtrose US	Média Elastografia Glúteo	Média Elastografia Cápsula	Média Elastografia Vasto Lateral	Média Elastografia Petíneo	Média Elastografia Grácil	Média Elastografia Adutor	Média Elastografia Reto Femoral	Espessura Cápsula
1	2	N	2.35	3.98	4.07	2.85	3.07	1.79	3.11	0.6
2	2	N	2.42	3.27	3.35	2.64	2.32	2.84	2.41	0.8
3	2.3	N	2.48	7.75	4.5	2.65	3.01	2.3	2.82	0.7
4	2.3	N	3	5.36	3.51	3.59	2.83	2.08	2.4	0.6
5	3	N	3.3	5.36	3.2	3.47	2.76	1.92	2.08	0.8
6	2	N	2.02	5.06	2.4	3.26	1.67	2.51	2.18	1.3
7	3	N	3.34	6.1	3.83	2.94	2.57	1.92	2.58	1
8	2.6	S	2.78	7.42	2.94	3.7	2.39	2.36	2.17	1
9	6	S	2.18	5.1	3.82	3.31	3.07	2.26	2.83	2.7
10	6	S	2.01	5.87	3.94	4.39	3.31	2.26	2.75	3.1
11	7	S	5.04	4.77	3.02	2.57	2.99	1.53	3.38	3.74
12	3	S	2.45	3.89	2.99	3.66	3.17	2.34	3.22	2.9
13	2.5	N	2.53	4.97	2.46	3.08	1.92	1.57	2.93	1.6
14	2.3	N	2.17	4.11	4.14	2.51	2.48	1.79	2.6	0.8
15	2.3	N	2.85	4.3	3.45	3.1	2.92	2.98	2.64	0.7
16	2	N	1.64	7.33	2.71	2.69	2.12	1.39	2.58	0.7
17	3	N	2.16	5.38	3.65	2.27	2.05	1.83	2.75	0.8
18	2	N	2.79	4.27	2	3.26	2.14	1.75	2.2	1.1
19	2.3	N	1.88	3.91	3.6	3.44	2.08	1.79	1.99	0.8
20	2.5	N	3.22	5.01	3.6	3.84	3.32	2.22	2.66	0.8
21	1.6	N	2.75	4.83	2.8	3.76	3.76	2.86	2.33	0.7
22	2.5	N	2.47	5.43	3.36	3.22	2.35	2.15	2.69	0.9
23	2.6	N	1.83	4.94	2.53	4.48	2.18	1.96	2.56	1
24	2.5	N	1.89	5.25	2.95	3.24	2.17	2.1	1.82	2
25	2.5	N	2.63	4.87	3.69	3.5	2.57	2.28	2.35	0.6
26	2.5	N	2.42	6.61	4.32	3.93	2.21	2.13	2.86	0.6
27	2.5	N	2.31	5.1	4.24	3.39	3.08	2.34	2.47	0.5
28	2.3	N	2.11	4.01	2.14	2.32	1.7	1.41	2.31	0.9
29	5	N	2.3	5.66	2.7	3.09	2.16	2.14	2.9	1.1
30	5.5	N	2.42	5.07	3.25	2.93	2.9	1.59	2.16	0.8
31	5	N	2.84	5.47	4.21	2.29	2.89	2.65	2.63	1.1
32		N	2.24	4.37	3.27	2.69	1.76	1.46	1.83	2.6
33	6	N	1.63	2.65	1.43	4.54	1.94	1.84	2.39	1.6
34	5	N	1.55	5.84	3.05	2.89	2.14	2.27	2.42	0.9
35	5.5	N	1.93	5.38	3.12	2.27	2.22	1.71	2.4	1.6
36	5	N	1.94	4.61	2.81	3.46	1.74	1.77	2.24	0.6
37	5.5	N	2.06	3.71	2.65	3.02	2.34	1.8	2.31	1.2
38	5.5	N	2.9	7.64	3.67	3.03	2.53	2.9	2.71	0.8
39	5.5	N	1.49	2.45	1.72	3.36	1.71	1.81	2.05	1.4
40	5.5	N	2.99	4.2	4.25	3.04	2.35	2.61	3.08	1.7
41	6	N	1.78	5.23	3.27	2.46	2.66	1.72	2.47	2.6
42	6	N	4.06	4.27	3.12	4.4	2.38	1.72	2.19	0.9
43	5	N	2.7	4.25	3.51	3.67	2.63	2.37	2.17	0.8
44		N	2.21	4.39	4.07	4.2	2.59	2.02	2.15	1
45		N	2.09	4.26	2.48	4.46	2.5	2.5	2.61	0.9
46	6	S	2.53	6.16	4.22	3.14	3.71	2.36	2.16	1.6
57	4.5	S	2.2	6.16	2.92	2.78	2.42	1.94	2.67	1.3
48	3	S	3.45	4.35	3.52	3.84	2.67	2.09	2.1	1.3
49	2.3	S	2	3.67	2.86	3.5	2.46	1.86	2.55	1.9
50	6.5	S	2.15	5.28	2.48	2.91	2.72	2	2.33	2.9
51	5.5	S	1.79	3.78	2.74	2.72	2.25	1.6	2.04	1.5
52	2	S	1.82	4.98	2.53	2.66	1.92	1.81	2.5	1.9
53	6.6	S	3.76	4.86	3.92	1.92	2.54	2.05	2.59	4
54	7	S	2.08	6.78	2.66	4.37	3.22	1.88	3.34	4
55	3	S	2.61	3.34	3.37	3.19	2.47	2.22	2.86	1.3
56	7	S	2.87	8.39	3.86	3.13	2.24	2.5	2.47	4.6
57	6.3	S	2.06	5.21	2.1	2.8	2.81	3.13	2.54	1.2
58	5.5	S	1.84	3.31	2.34	2.6	2.18	2.26	2.39	1.8
59	7	S	2.16	4.94	2.66	4.35	2.61	2.08	2.59	4.1
60	7	S	2.55	7.04	4.27	2.72	2.42	3.14	2.56	3.8
