# Supplementary material for: Accuracy of B-mode ultrasonography and ARFI elastography in the evaluation of the hip joint and hip musculature for the early and late diagnosis of hip dysplasia in dogs
Source: Research Square preprint supplement (doi:10.21203/rs.3.rs-2353704/v1), 2022-12-13
Supplement: Supplementary file 2 [file 81bc9099ddac0372acff5eda.xlsx]

## Sheet: Dados
Grupo 1 Animais Filhotes
Articulações	ID	Achados Artrose US	Média Elastografia Glúteo	Média Elastografia Cápsula	Média Elastografia Vasto Lateral	Média Elastografia Pectíneo	Média Elastografia Grácil	Média Elastografia Adutor	Média Elastografia Reto Femoral	Espessura Cápsula
1	0.4	N	2.67	3.96	3.51	2.11	1.66	1.68	1.43	0.7
2	0.49	N	2.51	5.65	3.4	3.13	1.93	2.07	2.44	1.2
3	0.48	N	2.23	4.79	3.38	4.21	2.95	1.67	2.24	0.6
4	0.14	N	2.24	5.14	3.37	1.84	2.01	1.6	2.63	0.6
5	0.37	N	2.35	4.06	3.3	2.42	2.31	1.49	1.86	0.6
6	0.44	N	2.83	5.19	3.77	3.86	2.4	2.31	2.91	1.4
7	0.49	N	2.13	5.17	3.58	2.7	2.79	1.65	2.81	0.8
8	0.1	N	1.44	3.64	2.11	2.28	2.44	1.95	3.03	0.6
9	0.36	N	3.45	5.48	3.38	3.15	2.71	1.81	2.81	0.5
10	0.48	N	2.17	6.89	4.39	2.43	2.32	1.53	2.25	0.7
11	0.5	N	2.56	4.89	3.24	4.19	2.4	2.07	2.66	1
12	0.46	N	3.18	4.83	3.15	3.39	3.44	2.29	2.96	0.5
13	0.49	N	2.17	4.71	2.8	3.18	2.58	2.16	2.35	0.8
14	0.5	N	2.93	4.85	3.65	3.55	2.93	2.68	2.87	1.1
15	0.5	S	2.96	5.58	3.91	3.29	2.26	2.34	3.45	2.9
16	0.5	N	3.46	4.83	3.24	2.46	2.63	1.81	2.35	0.6
17	0.46	N	2.95	6.24	4.06	3.05	2.54	1.81	2.81	0.6
18	0.65	N	1.93	3.01	2.78	2.38	2.04	1.57	2.29	1.1
19	0.69	N	2.69	4.42	3.44	3.7	2.19	1.99	1.93	1.3
20	0.56	N	2.22	4.48	2.74	2.27	2.26	1.74	2.31	0.8
21	0.82	N	2.13	3.9	3.25	3.04	2.23	2.21	2.76	1.6
22	0.77	N	2.58	5.33	4.29	3.45	2.79	1.79	2.49	1.3
23	0.74	N	3.16	5	2.97	2.2	2.1	2.07	2.86	1
24	0.7	N	1.75	5.12	2.66	3.23	2.33	1.69	2.39	1.4
25	0.77	N	2.47	5.23	3.75	2.85	3	1.8	2.52	1
26	1.19	N	1.72	4.7	3.52	7.88	3.25	1.79	2.6	2.4
27	0.88	N	2.36	4.67	3.93	3.52	3.36	1.88	1.98	2.4
28	1	N	2.6	5.01	2.22	6.26	2.26	1.61	2.19	1.4
29	0.82	N	2.11	4.37	2.57	1.85	2.09	1.9	2.08	1.3
30	0.9	N	2.42	5.5	3.66	5.45	2.55	1.65	2.14	2
31	1.14	N	2.1	4.44	2.49	2.87	3.24	1.48	2.14	2.1
32	0.72	N	2.84	5.64	4.58	3.2	2.27	1.7	1.93	0.7
33	0.77	N	2.87	5.13	3.05	2.37	2.18	1.64	2.57	0.7
34	0.64	N	2.58	5.06	4.14	4.8	2.56	1.96	2.29	0.7
35	0.85	N	3.31	5.59	3.35	3.05	2.13	1.77	2.5	1.2
36	0.82	N	1.8	4.5	4.2	5.21	2.93	2.18	1.52	3.5
37	0.84	N	1.79	5.43	2.2	3.43	2.56	1.36	1.81	1.5
38	1	N	2.25	4.69	2.77	2.31	2.05	1.88	2.97	2.2
39	0.6	N	3.23	5.42	3.93	3.14	3.66	2.99	2.63	0.7
40	1.26	S	3.59	6.18	3.69	3.21	2.41	2.48	3.49	2.8
41	0.85	S	1.66	4.51	4.18	2.68	2.35	1.92	3.02	2.2
42	0.67	S	4.06	4.96	3.42	2.94	3.07	2.4	2.37	1.3
43	0.89	S	2.93	5.5	2.94	5.92	2.04	1.73	2.29	2.2
44	1.14	S	2.54	5.91	3.61	4.76	3.38	2.27	2.57	3.1
45	0.78	S	3.47	6.25	4	4.56	2.78	2.71	3.43	2.5
46	0.94	S	1.75	3.28	4.48	2.98	2.12	1.54	2.41	2.5
47	0.76	S	2.48	6.47	2.79	4.34	2.59	2.21	2.66	1.8
48	1	S	2.49	5.26	3.45	3.3	2.13	1.69	2.49	2.2
